# Supplementary material for: Conserved phosphorylation hotspots in eukaryotic protein domain families
Source: PubMed Central journal article supplement (PMC6488607; doi:10.1038/s41467-019-09952-x), 2019-04-29
Supplement: 41467_2019_9952_MOESM5_ESM.pdf [file 41467_2019_9952_MOESM5_ESM.pdf]

PF00004 AAA, 1nsf\_A 113-120, pdb: NA



PF00005 ABC\_tran, 5kpi\_A 288-300, pdb: NA



PF00006 ATP-synt\_ab, 6b8h\_D 168-172, pdb: 287-291



PF00009 GTP\_EFTU, 3vmf\_A 21-26,57-63, pdb: 24-29,57-63



PF00012 HSP70, 4f00\_A 38-45,81-89,773-782, pdb: NA,NA,506-513



PF00013 KH\_1, 1dt4\_A 71-75,127-134, pdb: 46-48,61-63



PF00017 SH2, 5ehp\_A 47-51, pdb: 38-41



PF00022 Actin, 3dxm\_B 518-522,697-704, pdb: 203-207,241-246





PF00025 Arf, 5nzc\_F 170-177, pdb: 143-147



PF00038 Filament, 3uf1\_A 224-229, pdb: NA



PF00041 fn3, 5e95\_B 81-88, pdb: 46-49



PF00063 Myosin\_head, 3mkd\_A 293-300,547-556,926-934, pdb: 249-252,401-408,622-630



PF00067 p450, 4rui\_A 177-184,190-197, pdb: 130-133,138-143



5uq2\_A 55-60,223-228,988-992,1027-1035,1090-1104,1128-1141,1178-1186,1216-1225, pdb: 15-17,NA,NA,NA,151-155,156-160



PF00071 Ras, 5dha\_A 130-140,186-190, pdb: 71-78,110-113



PF00076 RRM\_1, 1b7f\_A 5-15, pdb: 131-140





PF00083 Sugar\_tr, 5eqg\_A 412-417,419-424,460-470, pdb: 232-235,236-237,245-251



PF00091 Tubulin, 5xi5\_B 69-85,95-106,201-206, pdb: 42-58,68-79,171-175



PF00102 Y\_phosphatase, 2fjn\_A 4-12,93-97, pdb: 543-550,562-563



PF00108 Thiolase\_N, 4n44\_A 247-252, pdb: 220-225



PF00113 Enolase\_C, 3zlf\_A 41-49,285-290, pdb: 179-187,419-424



PF00118 Cpn60\_TCP1, 3j3x\_A 21-32,246-250,253-271, pdb: 49-55,235-239,242-259



PF00122 E1-E2\_ATPase, 2zxe\_A 86-91, pdb: 215-220



PF00125 HistPF00125.pval, 3c1c\_A 88-93,127-133,141-152, pdb: NA,442-448,456-467





PF00151 Lipase, 1eth\_A 119-127,219-227, pdb: 80-87,170-178



PF00152 tRNA-synt\_2, 1bbu\_A 81-89, pdb: 234-242



PF00160 Pro\_isomerase, 5t9w\_A 263–269, pdb: 145–149



PF00166 Cpn10, 4pko\_1 19-24, pdb: 20-25



PF00171 Aldedh, 1qi1\_A 294-302, pdb: 245-252



PF00180 Iso\_dh, 9icd\_A 79-87, pdb: 101-106



PF00183 HSP90, 1y4s\_A 32-40,75-82,116-123,131-138, pdb: NA,NA,236-243,251-257



PF00190 Cupin\_1, 3s0m\_A 79-86, pdb: 118-122





PF00224 PK, 3srf\_A 12-20, pdb: 52-60



PF00225 Kinesin, 2p4n\_K 673-681, pdb: 253-261



PF00227 Proteasome, 1fnt\_F 23-31, pdb: 50-58



PF00241 Cofilin\_ADF, 1vfq\_A 11-15,160-165, pdb: 10-13,117-121



PF00244 14-3-3, 5nas\_A 43-51,211-219, pdb: 41-49,203-211



PF00245 Alk\_phosphatase, 4km4\_A 57-65, pdb: 98-106



PF00248 Aldo\_ket\_red, 4jir\_A 304-308, pdb: 210-214



PF00254 FKBP\_C, 2I2s\_A 46-51, pdb: 55-59





PF00270 DEAD, 1t6n\_A 441-446,489-497,607-615, pdb: 118-121,150-156,171-174



PF00271 Helicase\_C, 5n9f\_A 242-247, pdb: 524-529



PF00274 Glycolytic, 5vy5\_A 18-36, pdb: 31-49



PF00297 Ribosomal\_L3, 3ow2\_B 9-17,308-313, pdb: 6-14,NA



PF00300 His\_Phos\_1, 4gpz\_A 162-170, pdb: 113-121



PF00334 NDK, 2hvd\_A 86-94,112-122, pdb: 90-98,116-126



PF00339 Arrestin\_N, 4jqi\_A 106-111,129-134, pdb: NA,79-84



PF00400 WD40, 4a08\_B 6-13, pdb: NA





PF00411 Ribosomal\_S11, 5wnt\_K 105-109, pdb: 112-116



PF00415 RCC1, 4d9s\_A 32-40, pdb: NA



PF00428 Ribosomal\_60s, 2lbf\_A 124-135, pdb: NA



PF00433 Pkinase\_C, 4q9z\_A 18-26, pdb: 672-675



PF00443 UCH, 5j7t\_A 1064-1072,1176-1183,2978-2987,3021-3025,3094-3098,3239-3243, pdb: NA,NA,NA,NA,NA,NA



PF00478 IMPDH, 2a7r\_A 95-100,394-402, pdb: NA,267-275



PF00503 G-alpha, 5kdo\_A 72-79, pdb: 44-51



PF00565 SNase, 1snc\_A 16-21, pdb: 47-51





PF00578 AhpC-TSA, 2cx3\_A 116-122, pdb: 89-90



PF00579 tRNA-synt\_1b, 3n2y\_A 256-264, pdb: 214-222



PF00625 Guanylate\_kin, 1ex6\_A 50-54, pdb: 46-50



PF00630 Filamin, 1qfh\_A 288-293, pdb: 737-742



PF00651 BTB, 5x4n\_A 143-145, pdb: 125-126



PF00676 E1\_dh, 1umb\_A 281-298, pdb: 269-286



PF00723 Glyco\_hydro\_15, 3gly\_A 764-770, pdb: NA



PF00735 Septin, 4z54\_A 282-290, pdb: 201-205





PF00787 PX, 1ocs\_A 74-82, pdb: 79-87



PF00838 TCTP, 1h6q\_A 34-38, pdb: 27-31



PF00899 ThiF, 1yov\_B 673-678, pdb: NA



PF00923 Transaldolase, 3kof\_A 268–276, pdb: 222–230



PF00995 Sec1, 1y9j\_A 976-982,1149-1153, pdb: NA,NA



PF01044 Vinculin, 3s90\_A 778-784,797-806, pdb: NA,NA



PF01088 Peptidase\_C12, 2etl\_A 125-133, pdb: 121-129



PF01182 Glucosamine\_iso, 2wu1\_A 48-53, pdb: 11-16





PF01213 CAP\_N, 1s0p\_A 56-64,414-416, pdb: NA,223-223



PF01237 Oxysterol\_BP, 4jch\_A 533-541, pdb: NA



PF01246 Ribosomal\_L24e, 3cpw\_T 3-8, pdb: 4-8



PF01459 Porin\_3, 5xdo\_A 119-132, pdb: 98-110



PF01556 DnaJ\_C, 2qld\_A 4-10, pdb: 167-173



PF01576 Myosin\_tail\_1, 5tby\_A 557-565,567-571,661-666,982-986, pdb: NA,NA,NA,NA



PF01749 IBB, 1qgk\_B 65-73, pdb: NA



PF01776 Ribosomal\_L22e, 6em5\_U 103-111, pdb: 107-108





PF01798 Nop, 5gip\_A 139-147, pdb: 279-287



PF01873 eIF-5\_eIF-2B, 2qmu\_C 3-6, pdb: NA



PF02020 W2, 2iu1\_A 104-115, pdb: 383-390



PF02114 Phosducin, 2dbc\_A 313-319, pdb: NA



PF02731 SKIP\_SNW, 5mps\_K 49-66, pdb: 137-154



PF02800 Gp\_dh\_C, 1s7c\_A 45-61, pdb: 197-213



PF02878 PGM\_PMM\_I, 3bkq\_X 127-137, pdb: 102-109



PF03105 SPX\_, 5ijh\_A 180-184, pdb: NA





PF03234 CDC37, 5fwl\_E 9-20, pdb: 9-18



PF03720 UDPG\_MGDP\_dh\_C, 2y0c\_A 67-75, pdb: 381-383



PF03953 Tubulin\_C, 6bjc\_A 11-18, pdb: 273-280



PF03999 MAP65\_ASE1, 3nrx\_A 667-672,891-895, pdb: NA,NA



PF04086 SRP-alpha\_N, 5ck3\_A 354-360, pdb: NA



PF04180 LTVp, 5ww0\_C 545-550, pdb: 399-402



PF04410 Gar1, 2ey4\_C 142-150, pdb: NA



PF04427 Brix, 6c0f\_I 297-306,309-317, pdb: NA,NA





PF04847 Calcipressin, 1wey\_A 113-125, pdb: NA



PF04998 RNA\_pol\_Rpb1\_5, 5x22\_D 954-961, pdb: NA



PF05470 eIF-3c\_N, 3j8b\_C 7-20,160-164, pdb: NA,NA



PF05693 Glycogen\_syn, 5ux7\_A 659-671, pdb: NA



PF05793 TFIIF\_alpha, 1i27\_A 393-398,542-548,576-580, pdb: NA,NA,NA



PF06371 Drf\_GBD, 3o4x\_A 141-146, pdb: NA



PF07565 Band\_3\_cyto, 1hyn\_P 111-119, pdb: 169-173



PF07690 MFS\_1, 2gfp\_A 634-655,678-693,753-768,784-794,866-874, pdb: NA,187-194,NA,NA,203-205





PF07714 Pkinase\_Tyr, 4rwk\_A 9-13,347-354,648-656,665-683, pdb: 480-484,580-585,647-650,651-661



PF08337 Plexin\_cytopl, 2jph\_A 357-365, pdb: NA



PF08418 Pol\_alpha\_B\_N, 4y97\_A 199-205, pdb: NA



PF08597 eIF3\_subunit, 3bpj\_A 117-124, pdb: NA



PF08911 NUP50, 2c1m\_B 17-28, pdb: 16-22



PF09110 HAND, 2y9y\_A 79-87, pdb: 843-848



PF09359 VTC, 3g3q\_A 71-79, pdb: NA



PF09380 FERM\_C, 2yvc\_A 91-93, pdb: 295-297





PF09770 PAT1, 4ojj\_A 810-821, pdb: NA



PF10417 1-cysPrx\_C, 3a5w\_A 15-23, pdb: 172-180



PF10585 UBA\_e1\_thiolCys, 5l6h\_A 226-233, pdb: NA



PF13246 Cation\_ATPase, 5xab\_A 91-95, pdb: NA



PF13805 Pil1, 3plt\_A 11-24,230-238, pdb: NA,229-237



PF14572 Pribosyl\_synth, 4m0u\_A 54-59,93-97, pdb: NA,NA



PF15511 CENP-T\_C, 5x7x\_B 60-68, pdb: 76-84



PF16275 SF1-HH, 2m09\_A 79-90, pdb: 78-87
